# Supplementary material
Source: Springer Nature journal article supplement (https://www.springermedizin.de/resource/supplementary/12891_2010_951_MOESM3_ESM.pdf/9506776)
Supplement: MOESM3 [file 9506776]

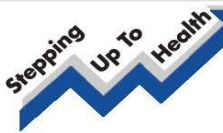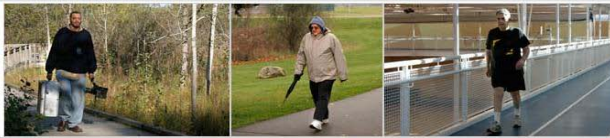

### Veterans Walk to Beat Back Pain

- Study info
- Sponsors

### User login

Username:

Password:

[Request new password](#)

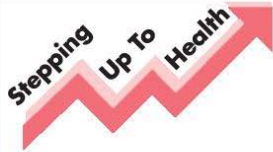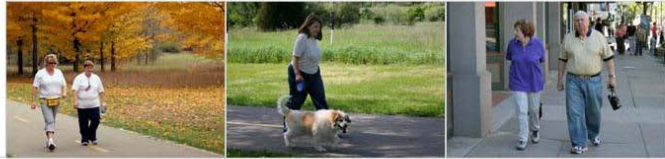

Your walking goal for today is **8300 steps.**

**Report an illness or injury**

### Jane

- Home
- Getting started
- Download software
- Forums
  - Profile
- Basic Back Care
- F.A.Q.
- Questions or concerns
- Logout

### Veterans Walk to Beat Back Pain

- Study info
- Sponsors

### Today's weather

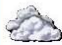

74 degrees at Ann Arbor, MI.

### Your progress

So far this week you have met your walking goal on 2 of 5 days. Your average daily step count for the week is 6009 steps.

Click on a day in the calendar to view that week. Click on a bar in the graph to see the day's detail.

September 2010

| S  | M  | T  | W  | T  | F  | S  |
|----|----|----|----|----|----|----|
|    |    |    | 1  | 2  | 3  | 4  |
| 5  | 6  | 7  | 8  | 9  | 10 | 11 |
| 12 | 13 | 14 | 15 | 16 | 17 | 18 |
| 19 | 20 | 21 | 22 | 23 | 24 | 25 |
| 26 | 27 | 28 | 29 | 30 |    |    |

Week and day Step types Goal history

### Steps for the week of August 29, 2010

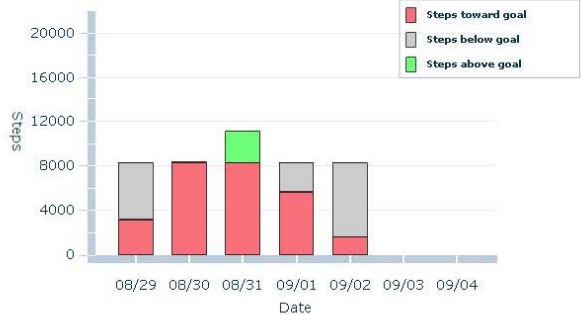

Active conversations In the spotlight Quick tip Walking blog

- What's your snack of choice?
- Is anybody out there??
- Inversion Tables
- Road Blocks and Super High Ways
- What's that blinking "B1" icon on my pedometer?

[more](#)
